# Supplementary material
Source: MDPI journal article supplement (https://www.mdpi.com/1424-8247/15/11/1347)
Supplement: s1 [file s1]

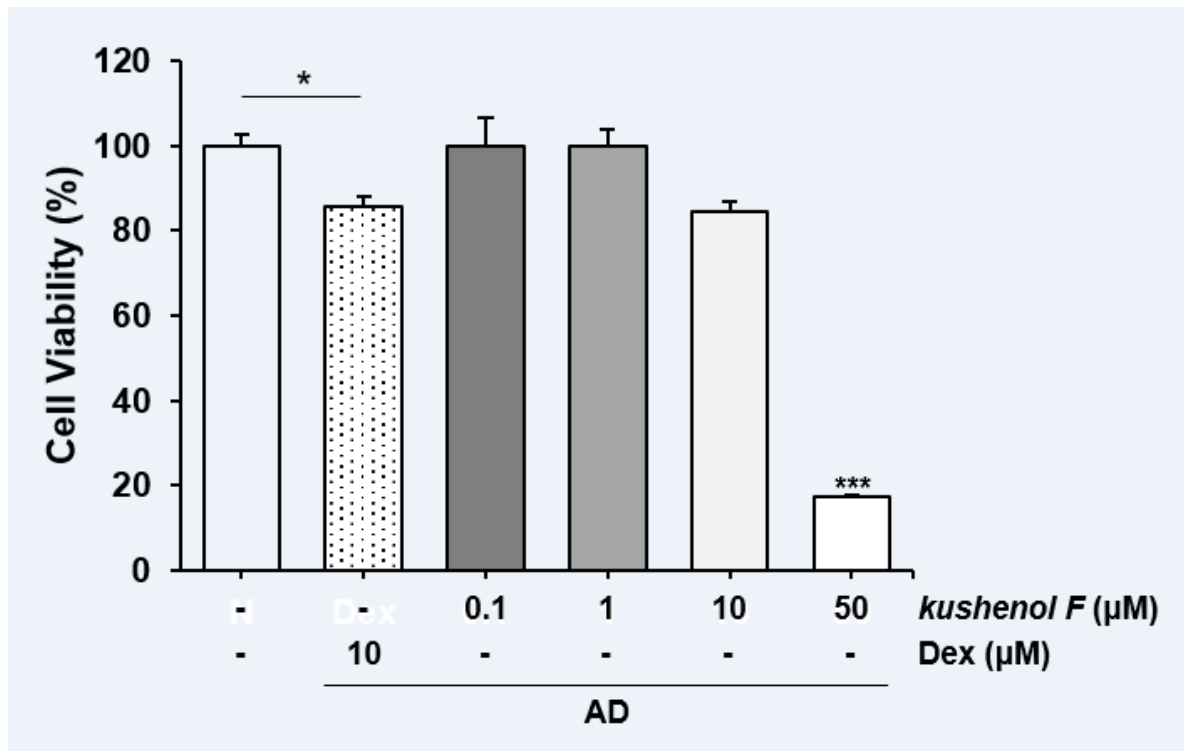

**Figure S1.** NHEKs were treated with various concentrations of kushenol F (0.1–50 μM). Cell viability was analyzed using the MTT assay. Data are presented as the mean ± SD of three independent experiments. \*  $p < 0.05$  and \*\*\*  $p < 0.001$  vs. control. NHEK, normal human epithelial cell.
